# Supplementary material for: Immediate Neutrophil-Variable-T Cell Receptor Host Response in Bacterial Meningitis
Source: PubMed Central journal article supplement (PMC6454057; doi:10.3389/fneur.2019.00307), 2019-04-02
Supplement: Data_Sheet_1.pdf [file Data_Sheet_1.pdf]

## Supplementary Material

### Supplementary Table S1

Patient characteristics, co-morbidity and baseline laboratory parameters of patients with acute bacterial and viral meningitis

### Supplementary Table S2

High-throughput sequence reads of the TCR $\beta$  CDR3 variants from patient 1, 2 and 3

### Supplementary Figures

S1: CSF-cytology from patients 1,2,3,6

S2: CSF-cytology from patient 12

S3: Isotype control staining

S4: CSF-cytology from patient 4 in acute and post-acute phase

S5: TCR $\beta$  immunofluorescence stainings

S6: Confocal immunofluorescence microscopy of patients 2 and 11

S7: Mass-spectrometry identification of TCR $\beta$  variants

S8: Detection of genomic V(D)J rearrangements

S9: IL-8 levels in CSF and PB

S10: Repertoire diversities in PB- and CSF-neutrophils

S11: Repertoire analyses by CDR3 spectratyping

S12: CDR3 Repertoire analyses on the sequence level

S13: NGS TCR $\beta$  transcriptome analyses

S14: Quantitative length variant analyses

S15: V $\beta$  gene usage of neutrophils and lymphocytes from the CSF

S16: Relative abundance of TCR $\beta$  CDR3 transcript variants

S17: Repertoire changes after ex vivo exposure to bacterial pathogens

S18: Ex vivo targeting of baits to the TCR $\alpha\beta$  enhances neutrophil phagocytosis

S19: Analyses of TCR $\alpha\beta$ -directed bead uptake

S20: Enhanced TCR $\alpha\beta$ -directed phagocytosis in neutrophils

Additional *unpublished* material for editors and referees: Expression of the neutrophil TCR in septic arthritis, infected catheter wound and acute pleuritis
