# Supplementary material for: Immediate Neutrophil-Variable-T Cell Receptor Host Response in Bacterial Meningitis
Source: PubMed Central journal article supplement (PMC6454057; doi:10.3389/fneur.2019.00307), 2019-04-02
Supplement: Data_Sheet_2.pdf [file Data_Sheet_2.pdf]

Figure S1A

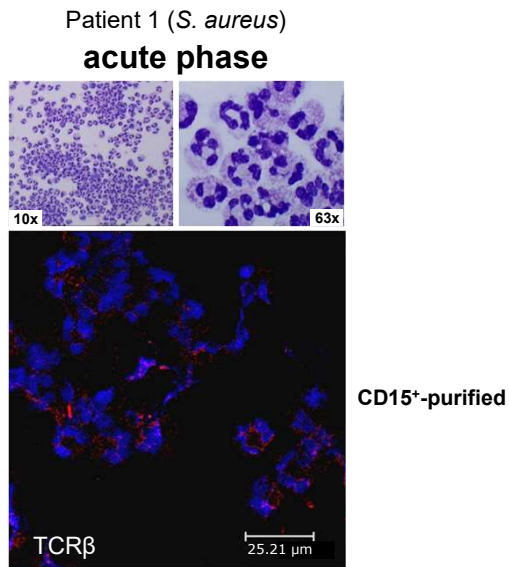

CSF-cytology image from patient 1 with acute *S. aureus* meningitis. The top row in the panel represents Giemsa stained CSF-cytospin preparations. The presence of bacteria (asterisk) is shown at a higher magnification (right). Confocal immunofluorescence microscopy (bottom) shows TCRβ expressing CD15<sup>+</sup>-purified CSF neutrophils (red). Nuclei (blue) are counterstained with DRAQ5.

Figure S1B

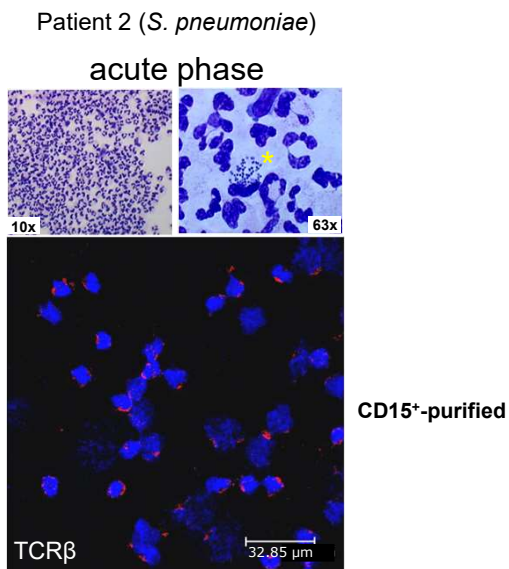

Fuchs et al.

CSF-cytology image from patient 2 with acute *S. pneumoniae* meningitis. Details as in legend Fig. S1A

Figure S1C

Fuchs et al.

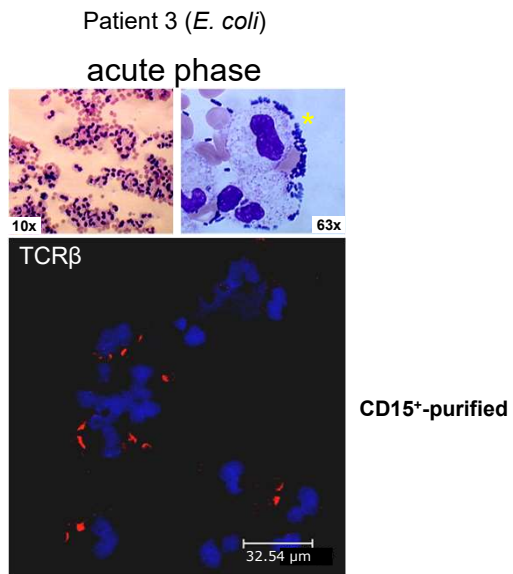

CSF-cytology image from patient 3 with acute *E.coli* meningitis. Details as in legend Fig. S1A

Figure S1D

Fuchs et al.

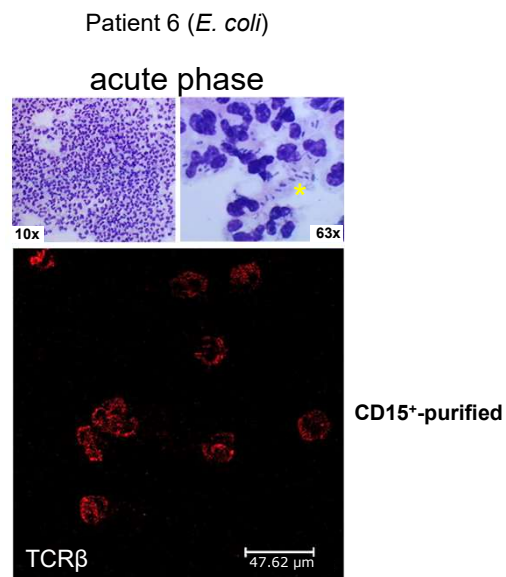

CSF-cytology image from patient 6 with acute *E.coli* meningitis. Details as in legend Fig. S1A. Confocal immunofluorescence microscopy (bottom). Nuclei unstained.

Figure S2

Fuchs et al.

Patient 12 (*Varicella zoster virus*)

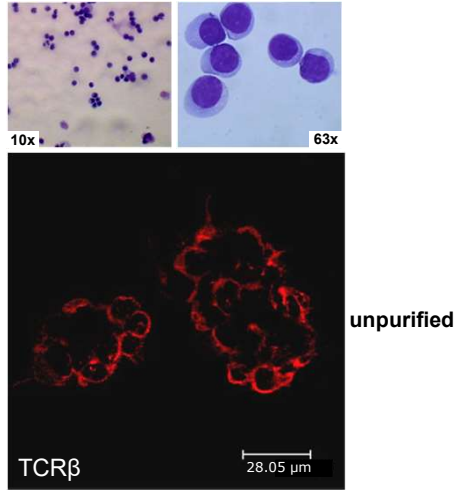

CSF-cytology from a patient with viral meningitis (*Varicella zoster virus*). Positive control for TCR $\beta$  immunocytochemistry. Shown are CSF cytology and TCR $\beta$  expression in a patient with acute viral meningitis caused by *varicella zoster virus*. Cytospin preparations and TCR $\beta$  immunostainings (red) were performed under identical conditions as for the patients with bacterial meningitis with the exception that cells were not MACS-purified. Note marked TCR $\alpha\beta$  expression by CSF lymphocytes.

Figure S3

Isotype control for TCR $\beta$  staining of CSF-cytospin smears

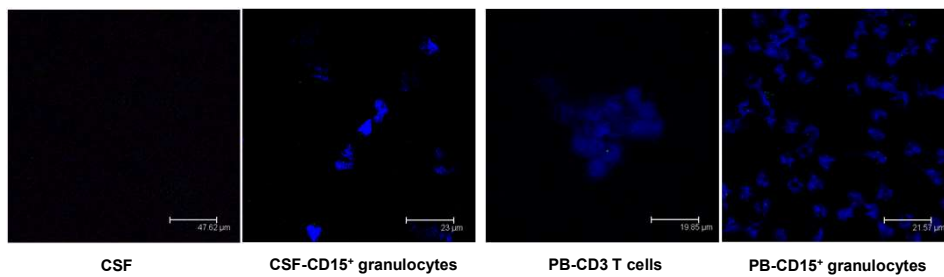

Isotype control stainings of CSF and peripheral blood. Isotype control staining of unpurified (CSF, left) and various MACS-purified leukocyte samples from CSF or peripheral blood (PB), respectively. Note that consistently no immunostaining was observed when isotype-matched control antibodies were used in place of the anti-TCR $\alpha\beta$  (mouse IgG1) primary antibody. Nuclei (blue) are counterstained with DRAQ5 (except the left panel). The samples were collected from patients 1, 2, 6 and 7, respectively.

Fuchs et al.

Figure S4

Fuchs et al.

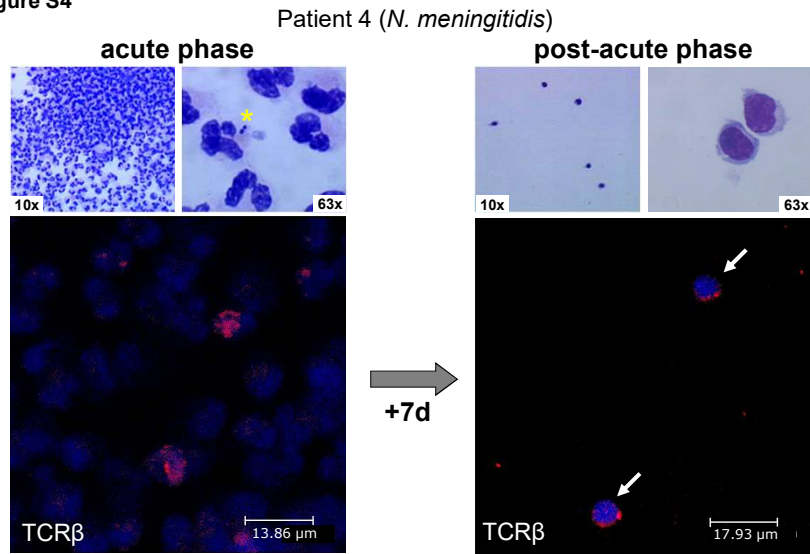

CSF-cytology from patient 4 with *N. meningitidis* meningitis: acute vs. post-acute phase. CSF cytology and TCR $\beta$  expression in the acute vs. post-acute phase of *N. meningitidis* meningitis. Shown are cytospin preparations and TCR $\beta$  immunostainings (red) from CSF collected 8 h after onset of symptoms (acute phase) and after 7 days of standard antibiotic therapy (post-acute phase). Note that the TCR $\beta$  positive and negative neutrophils are substituted by TCR $\beta$  expressing T cells (arrows). Bacteria are highlighted by a yellow asterisk.

Figure S5

Fuchs et al.

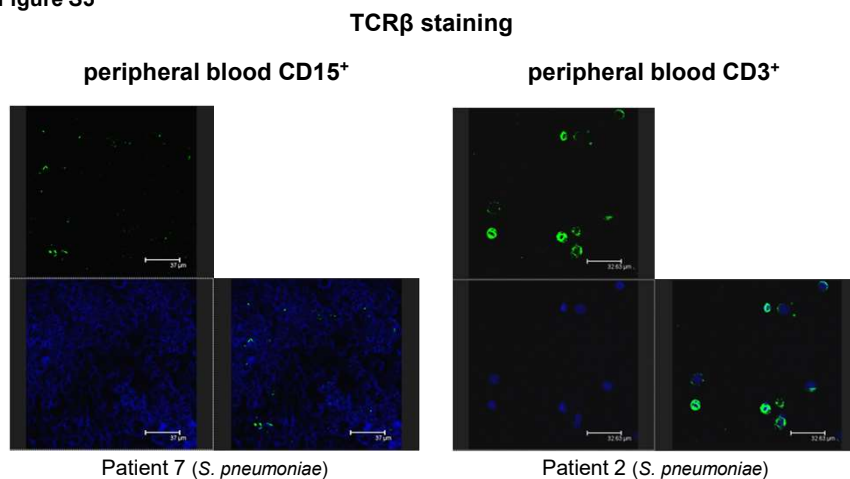

**TCR $\beta$  immunofluorescence staining of peripheral blood neutrophils and lymphocytes in patients with acute *S. pneumoniae* meningitis.** Confocal immunofluorescence microscopy demonstrating TCR $\beta$  positive (green) CD15<sup>+</sup>-purified neutrophils (left) and CD3<sup>+</sup>-purified T cells (right) in peripheral blood from two patients with acute bacterial meningitis. Note that only a minor subpopulation of peripheral blood neutrophils express the TCR $\beta$  (left). In each panel the bottom right quadrant represents the merged image of the two left quadrants. CD15<sup>+</sup> neutrophils and CD3<sup>+</sup> T cells were purified by MACS before immunostaining. Nuclei are counterstained with DRAQ5.

Figure S6A

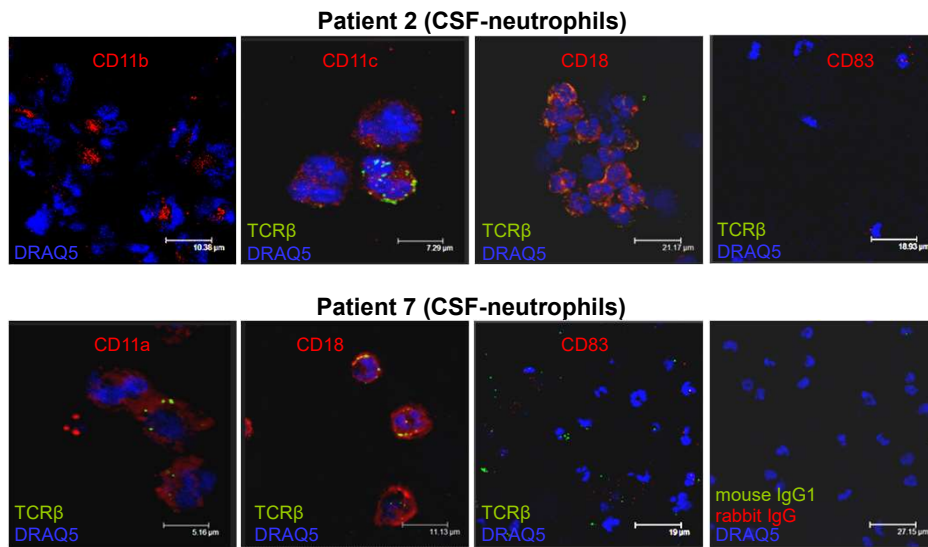

Confocal immunofluorescence microscopy shows consistent expression of canonical neutrophil markers (CD11a, CD11b, CD11c, CD18) in CSF neutrophils from two representative patients. The lineage markers CD11a, CD11b, CD11c, CD18 and CD83, respectively, are stained red, and the TCRβ is stained green. Nuclei (blue) are counterstained with DRAQ5. The bottom right panel shows representative isotype controls. Note the absence of the dendritic cell marker CD83 from CSF neutrophils.

Figure S6B

**Patient 11 (PB-neutrophils)**

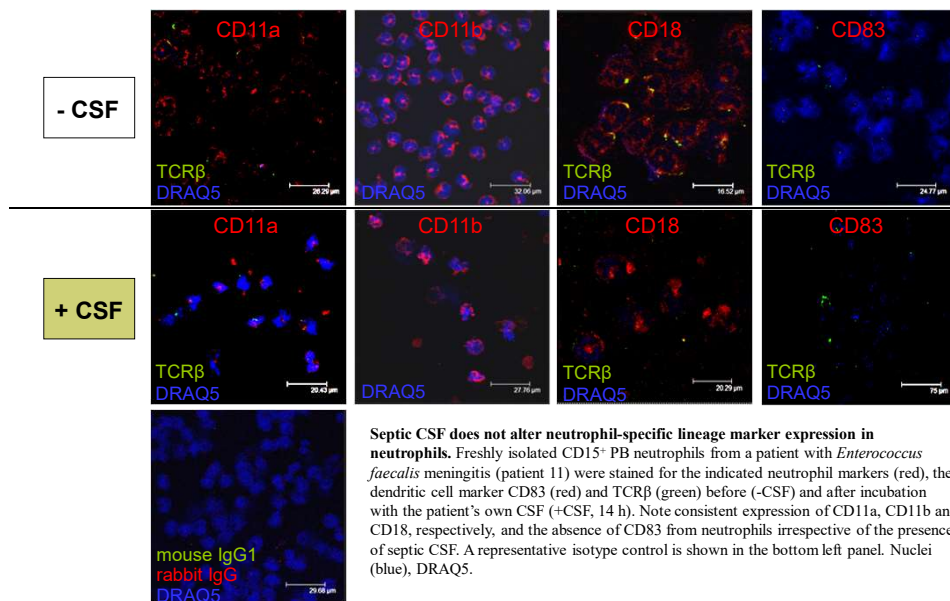

Septic CSF does not alter neutrophil-specific lineage marker expression in neutrophils. Freshly isolated CD15<sup>+</sup> PB neutrophils from a patient with *Enterococcus faecalis* meningitis (patient 11) were stained for the indicated neutrophil markers (red), the dendritic cell marker CD83 (red) and TCRβ (green) before (-CSF) and after incubation with the patient's own CSF (+CSF, 14 h). Note consistent expression of CD11a, CD11b and CD18, respectively, and the absence of CD83 from neutrophils irrespective of the presence of septic CSF. A representative isotype control is shown in the bottom left panel. Nuclei (blue), DRAQ5.

Figure S7A

Fuchs et al.

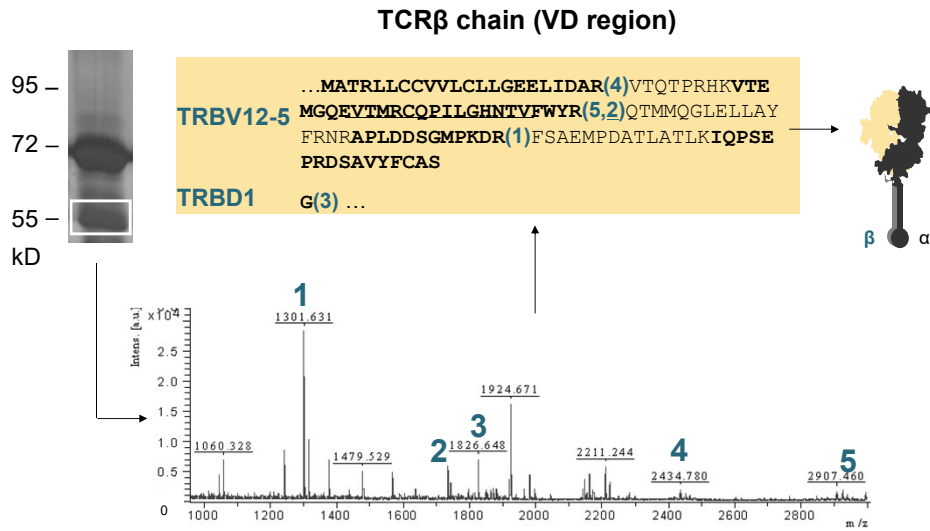

**Mass-spectrometric identification of a rearranged V $\beta$ -chain variant in CSF neutrophils from patient 3.** Mass-spectrometric identification of a rearranged TCR V $\beta$ -chain in CSF neutrophils from patient 3 (*E. coli* meningitis). Protein lysates from the patient's CSF CD15<sup>+</sup>-neutrophils were immunoprecipitated using an anti-TCR $\beta$  antibody and the predicted band (boxed) was analyzed by MALDI-TOF mass spectrometry. Peaks 1-5 represent TCR V $\beta$ -specific peptide fragments. Amino acid sequence identities with known TCR V $\beta$ -chains are bolded. They are consistent with a V $\beta$ 8-D $\beta$ 1 rearranged clonotype.

Figure S7B

Fuchs et al.

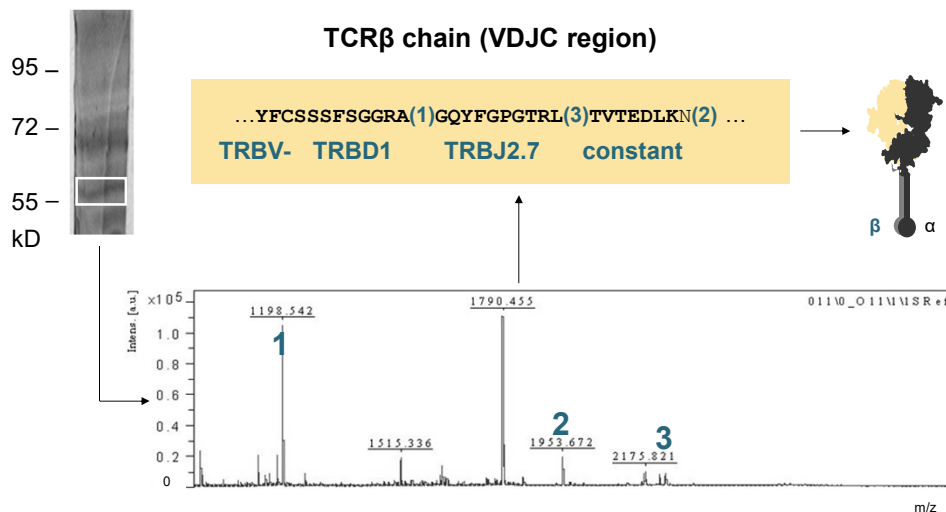

**Mass-spectrometric identification of a rearranged V $\beta$ -chain variant in CSF neutrophils from patient 7.** Mass-spectrometric identification of a rearranged TCR V $\beta$ -chain in CSF neutrophils from patient 7 (*S. pneumoniae* meningitis). For details see legend Fig. S7A. The identified TCR variant peptides (1-3) are consistent with a TRBV-TRBD1-TRBJ2.7 clonotype.

Figure S8

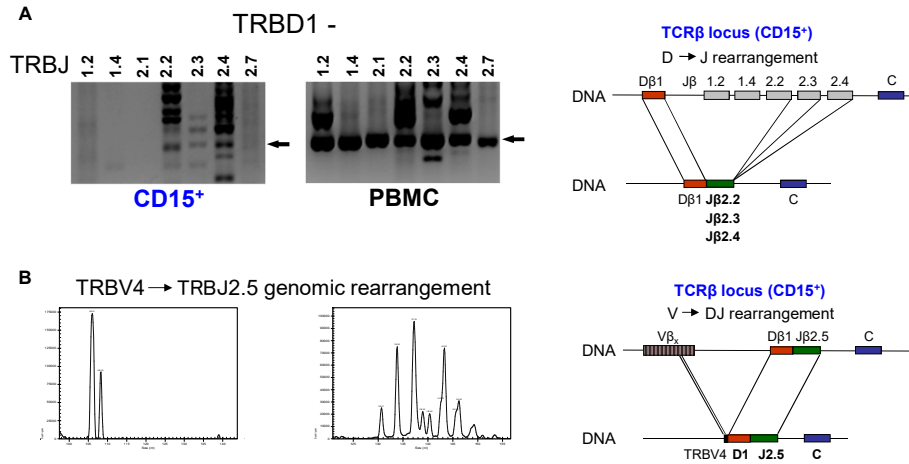

**Detection of D → J and V → DJ rearrangement in the TCRβ gene locus of human CD15<sup>+</sup> neutrophils.** (A) Arrows denote the presence of TRBD1 → TRBJx rearrangements in human peripheral blood CD15<sup>+</sup> neutrophils and mononuclear cells (PBMC, positive controls) which were confirmed by sequencing. TRBV → TRBD/TRBJ rearrangement is representatively shown for TRBV4 and TRBJ2.5 using complementary determining region 3 (CDR3) length spectratyping (B). Genomic organization of the identified rearrangements are schematically drawn (right). Rearrangement of the TCRβ gene locus we tested using a PCR assay based on the protocols established by van Dongen et al. (Leukemia 17: 2257-2317, 2003) in combination with sequencing of specific amplification products.

Figure S9

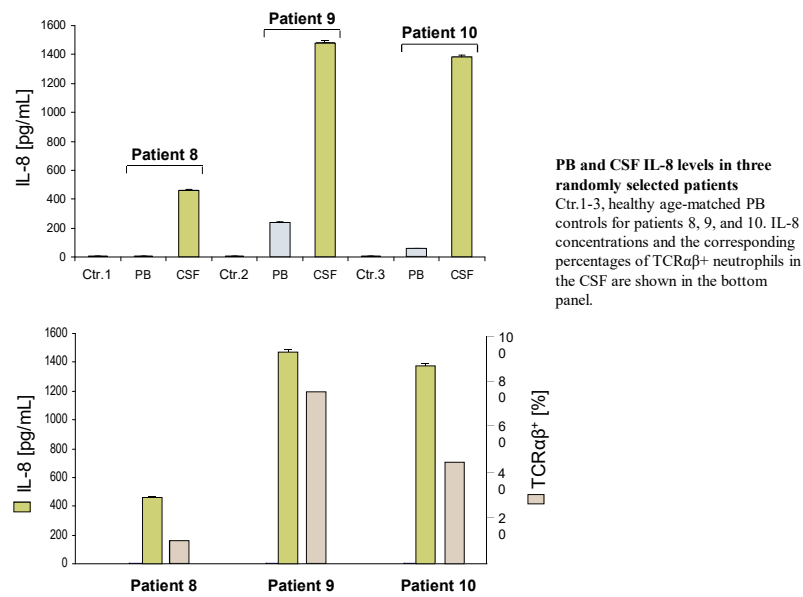

Figures S10

Following page:

**Repertoire diversities of the TCR variable  $\beta$ -chains that are expressed by PB- and CSF neutrophils from patients 1, 2 and 3, respectively, during acute-phase meningitis.**

RT-PCR expression profiling was performed for all 25 known human TCR V $\beta$  chains (V $\beta$ 1-25). The scattergrams (top) document that the CD15<sup>+</sup> neutrophils are free of T lymphoid cells (CD2). For each patient, expressed TCR V $\beta$  chains are represented by filled boxes and their respective designations are indicated. Empty boxes represent nonexpressed V $\beta$  chains. Note the marked increase in expressed TCR V $\beta$  chain genes in CD15<sup>+</sup> CSF neutrophils relative to CD15<sup>+</sup> PB neutrophils. The detailed repertoires assessed by length variant analysis of the antigen-binding CDR3 $\beta$  region ("CDR3 $\beta$  spectratyping") in each of the expressed V $\beta$  chains are shown.

Fuchs et al.

Figure S10

Fuchs et al.

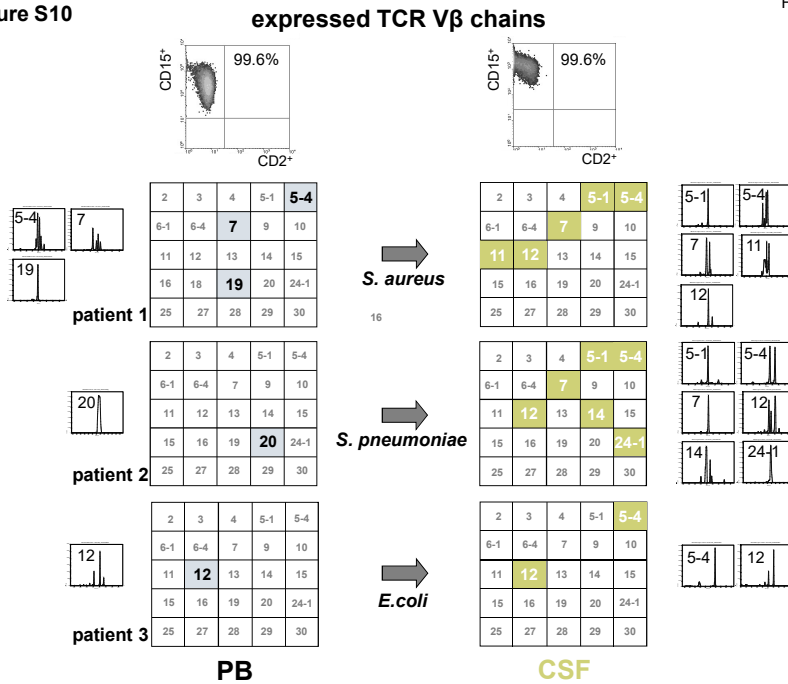



Figure S11

Fuchs et al.

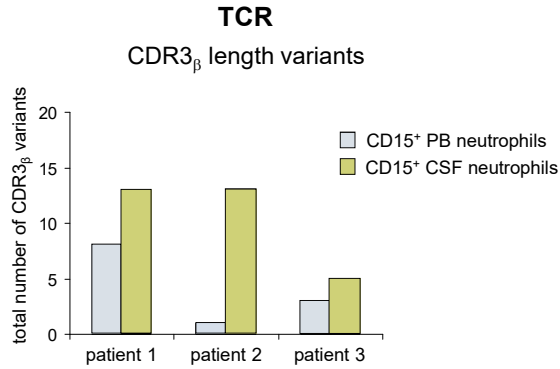

Repertoire analyses by CDR3<sub>β</sub> spectratyping in all three patients reveal that the total numbers of the expressed TCR<sub>β</sub> CDR3 length variants are consistently higher in CD15<sup>+</sup> CSF neutrophils than in CD15<sup>+</sup> PB neutrophils indicative of repertoire broadening at the site of inflammation.

Figure S12

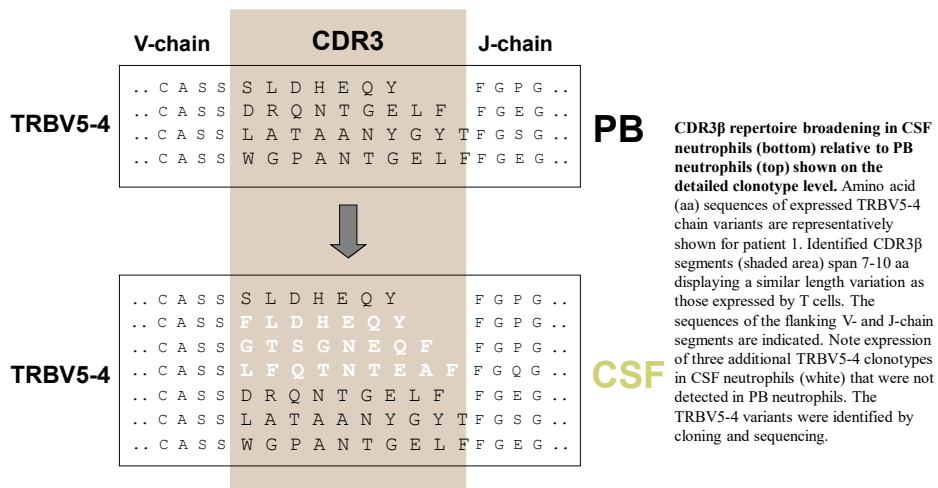

Fuchs et al.

## Figures S13

### Following pages:

NGS TCR $\beta$  transcriptome analyses reveal induction of the TCR in CSF neutrophils during the acute phase of bacterial meningitis.

(top) Repertoire diversity tree plots visualize the relative abundance of the TCR $\beta$  CDR3 transcript variants that are expressed by CD15<sup>+</sup> neutrophils in CSF and in peripheral blood of patient 2 (Fig S13a) and patient 3 (Fig. S13b). Each spot represents a rearranged TCR $\beta$  transcript that encodes a unique CDR3 $\beta$  sequence. It is defined by a unique color and its area is proportional to the relative transcript frequency. The position of each spot within the plot area is defined according to its V $\beta$  usage (x-axis: V $\beta$ 1 $\rightarrow$ V $\beta$ i) and J $\beta$  usage (y-axis: J $\beta$ 1 $\rightarrow$ J $\beta$ i). Each plot has a distinct color code. Total numbers of identified nonredundant (“unique”) TCR $\beta$  CDR3 sequence variants are indicated for each diversity tree plot. CDR3, complementarity determining region 3.

(bottom) Detailed list of the 10 most frequently expressed TCR $\beta$  CDR3 variants in each neutrophil population. Transcript copy numbers (f) are indicated. TCR $\beta$  variants that are shared between PB and CSF neutrophils are connected by arrows. TCR $\beta$  variants that show an increase in CSF neutrophils are highlighted in blue.

Figure S13A

Patient 2

Fuchs et al.

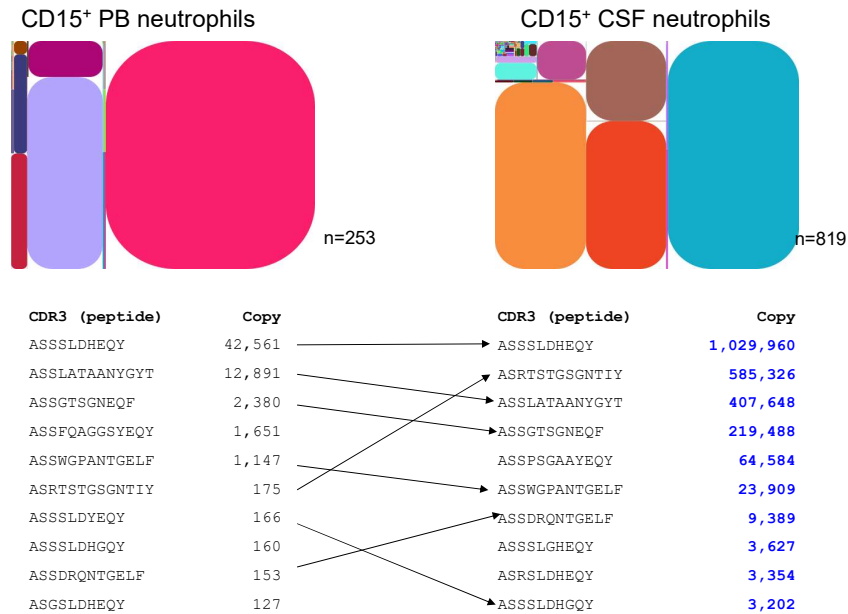

Figure S13B

Patient 3

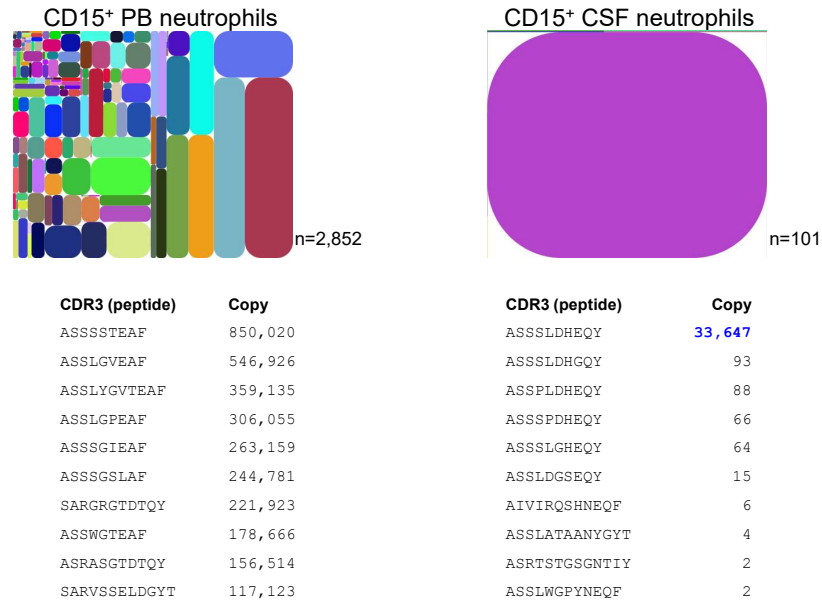

Figure S14

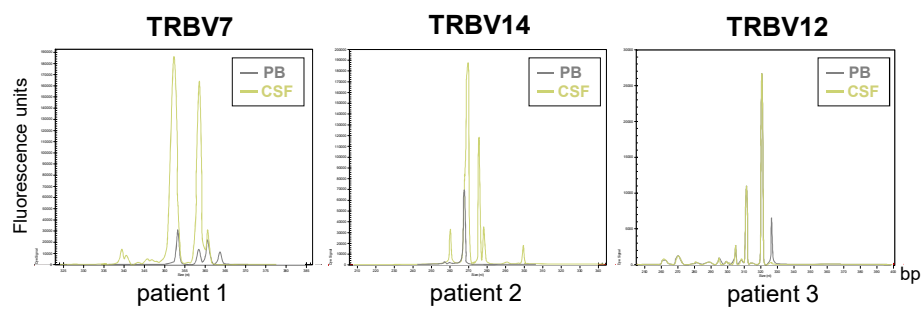

Quantitative length variant analysis of the antigen-binding CDR3 $\beta$  region in patients 1, 2 and 3 shows a dramatic increase in TCR V $\beta$  repertoire gene expression levels in CSF neutrophils compared to PB neutrophils as exemplified for three TCR variable chains (TRBV7, TRBV14 and TRBV12). Peak heights are indicated as fluorescence units.

**Figures S15**

**Following pages:**

V $\beta$  gene usage of CD15<sup>+</sup> neutrophils and CD3<sup>+</sup> lymphocytes, respectively, in peripheral blood and CSF of patient 1 (A) and patient 2 (B,C). The 2D-plots demonstrate the relative usage of the V $\beta$  genes for each cell compartment. The results are shown as regular and normalized distributions. The normalized distribution counts the value (for V Gene usage) of each distinct CDR3 as one, no matter how many of the particular CDR3s are observed. In short, each CDR3-VDJ combination is treated as a quantity of 1 regardless of read count, and then analyzed for V usage. This allows for a view of the repertoire removing the skewing which may occur due to one or just a few highly dominant clones. The regular distribution is based on the number directly observed from the read count data. Note the markedly restricted V $\beta$  gene usage in CD15<sup>+</sup> cells relative to CD3<sup>+</sup> cells. X-axis: V $\beta$  gene; y-axis: percentage of used V $\beta$  genes.

**Figures S15A**

**Patient 1- normalized distribution**

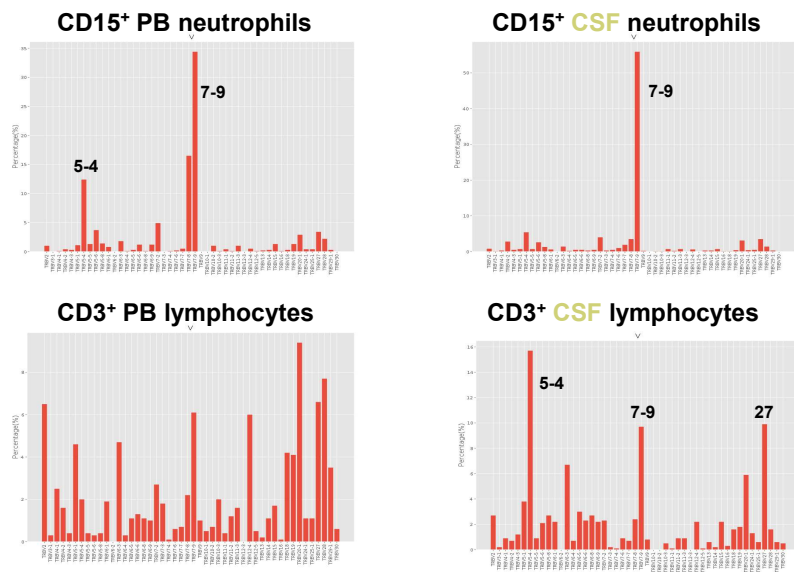

Figure S15B

Patient 2- regular distribution

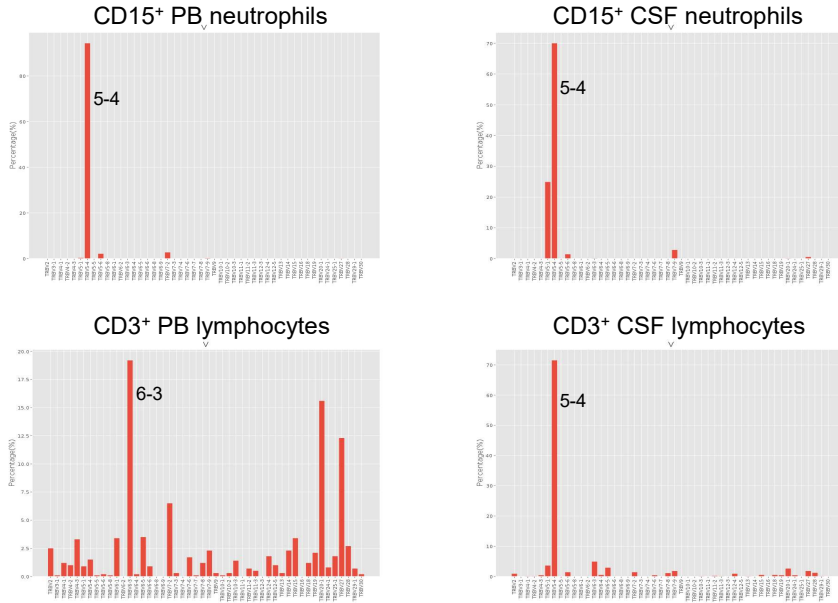

Figure S15C

Patient 2- normalized distribution

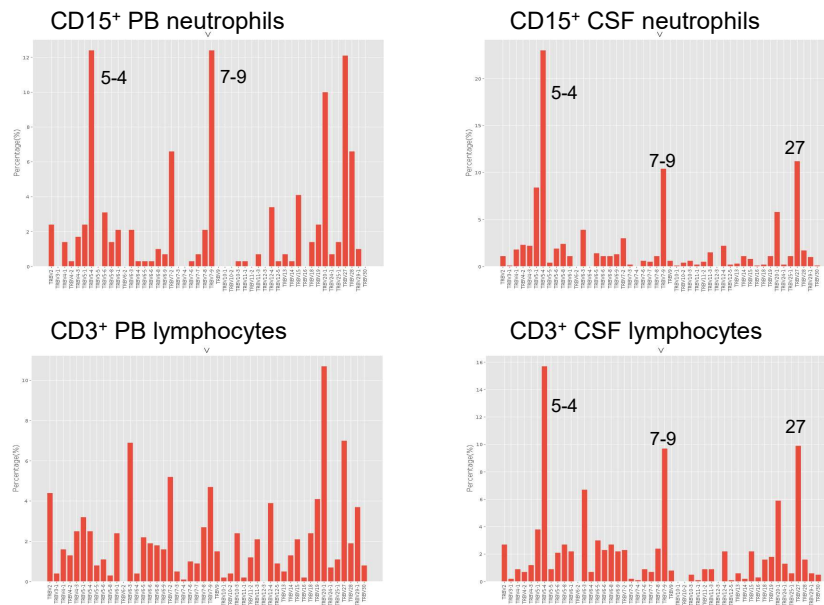

**Figures S16**

**Following pages:**

**(top)** Relative abundance of TCRβ CDR3 transcript variants expressed by CD15<sup>+</sup> neutrophils and CD3<sup>+</sup> lymphocytes in CSF (patient 1). Total numbers of identified nonredundant TCRβ CDR3 sequence variants are indicated for each leukocyte subpopulation.

**(bottom)** Comparison of the 10 most frequently expressed TCRβ CDR3 variants reveals that neutrophils and lymphocytes in CSF share common repertoires (arrows), but also express a similar proportion of distinct TCRβ variants. Numbers designate transcript copy numbers. Note that two of the shared TCRβ CR3 sequence variants exhibit higher expression rates in CSF neutrophils than in CSF lymphocytes (blue).

**Figure S16**

Patient 1

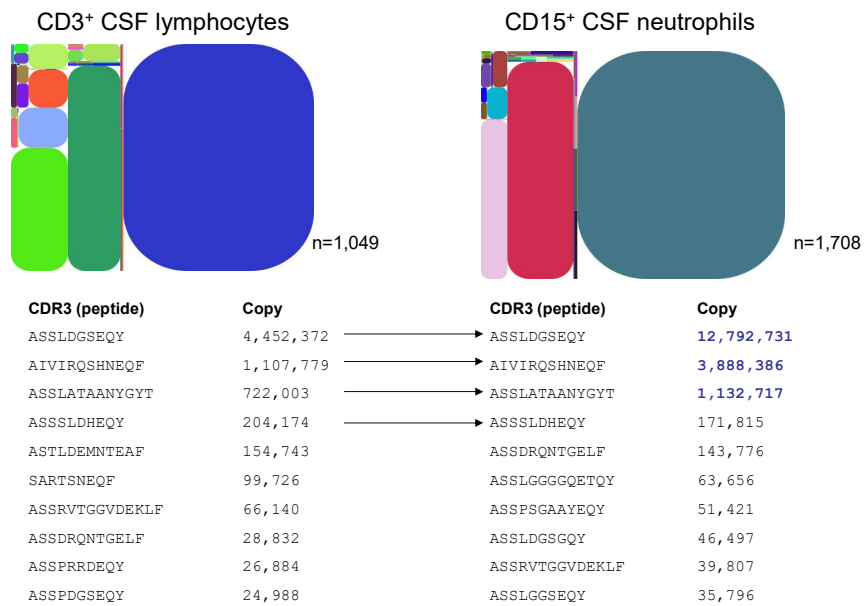

Figures S17

(Following pages):

**Ex vivo exposure to bacterial pathogens that cause meningitis triggers dynamic TCR Vβ repertoire changes.**

Figure S9 shows the TCR Vβ repertoires that are expressed by purified peripheral blood CD15<sup>+</sup> neutrophils from two healthy subjects (2,3) after 9 h incubation with *N. meningitidis* (orange), *S. pneumoniae* (green) and in the absence of a bacterial pathogen, respectively (∅, control, black). The detailed neutrophil-TCR Vβ repertoires are shown for each subject in the right panels. The purity of the CD15<sup>+</sup> neutrophils is shown in the scattergrams (left). Note that *N. meningitidis* and *S. pneumoniae* induce distinct neutrophil-TCR Vβ chain usage (center) and CDR3β repertoires (right) in each subject.

Fuchs et al.

Figure S17A

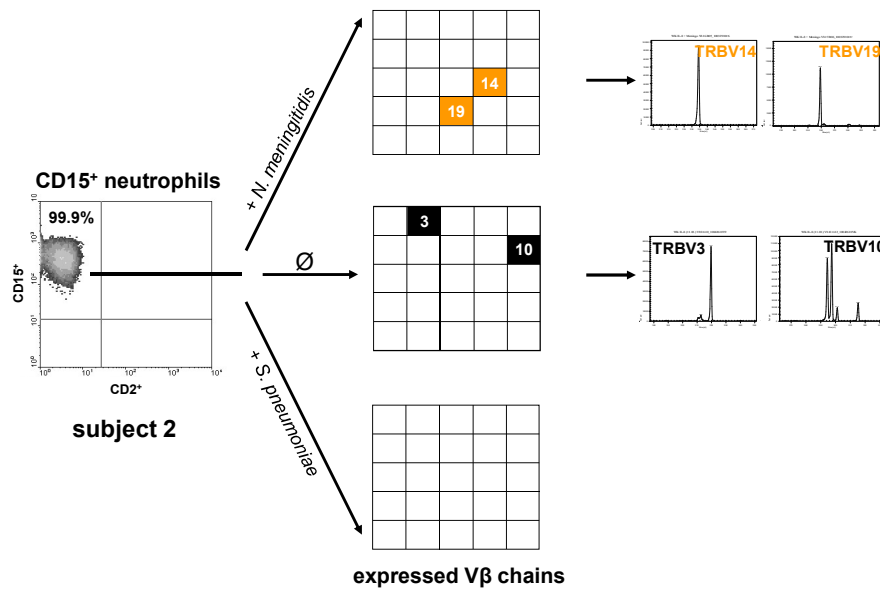

Fuchs et al.

Figure S17B

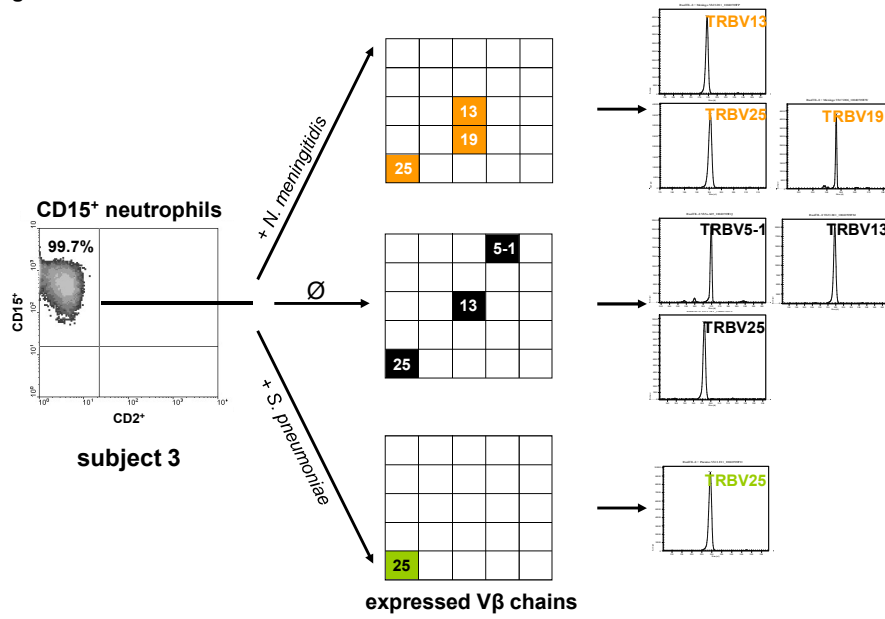

Fuchs et al.

Figure S18

TCRαβ -directed phagocytosis

Fuchs et al.

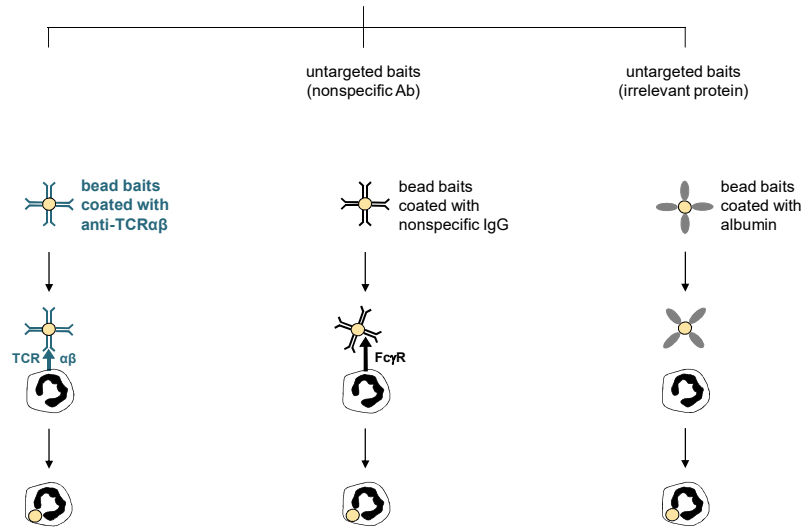

**Ex vivo targeting of baits to the TCRαβ enhances neutrophil phagocytosis.** Schematic representation of phagocytosis assay used for *ex vivo* targeting of baits to the neutrophil TCRαβ. Neutrophils were challenged with polystyrene bead baits (Ø 4.5 µm) coated with anti-TCRαβ antibodies and uptake of beads was recorded. Beads coated with nonspecific IgG isotype antibodies, potentially binding to the Fcγ receptor (FcγR), or albumin (irrelevant protein) served as controls (untargeted baits).



Figure S19A

Fuchs et al.

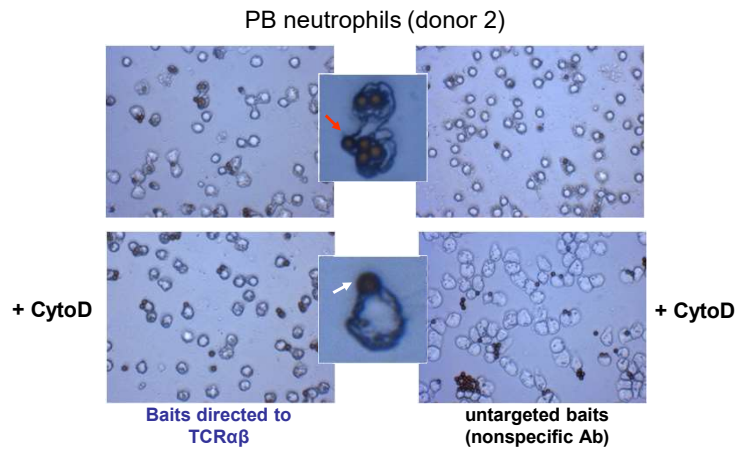

**TCRαβ-directed bead uptake in intact neutrophils and during cytochalasin D-induced blockade of phagocytosis.**  
 (A) Representative unstained cytospin preparations (20x) of purified CD15+ PB neutrophils from a normal individual (donor 2) that were co-incubated with bead baits targeted to the TCRαβ or untargeted beads (nonspecific IgG) for 3 hours. Cytochalasin D (5 μg/ml) treated neutrophils are shown in the bottom panel (+ CytoD). Right panel: untargeted control beads (nonspecific IgG). The red arrow highlights internalized beads at a higher magnification, the white arrow an external bead during inhibition of phagocytosis.

Figure S19B

Fuchs et al.

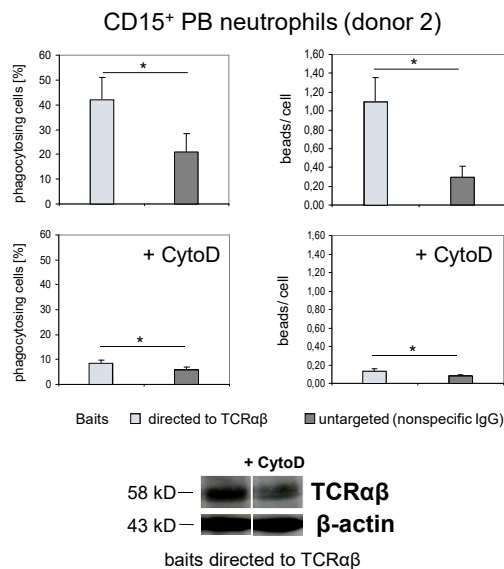

**(B)** Quantitative analysis of bead phagocytosis (percentage of phagocytosing cells, left; beads/cell, right) as shown in A. Note that neutrophil phagocytosis is enhanced when beads are directed to the TCRαβ and the pro-phagocytic effect is abrogated when phagocytosis is suppressed (+ CytoD). \*  $p < 0.01$  (student's pair test). The immunoblot in the bottom panel demonstrates the presence of the TCRαβ in the neutrophils to which bead phagocytosis was directed. A loading control is shown (β-actin).

**Figure S20**

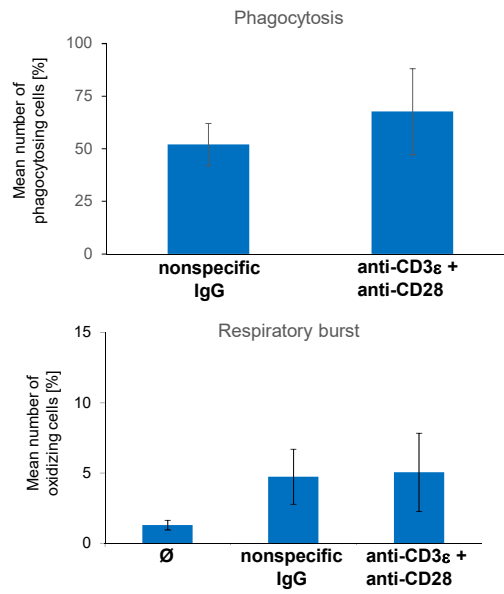

**Enhanced TCR $\alpha\beta$ -directed phagocytosis in neutrophils.** Quantitative analysis of phagocytosis and respiratory burst (percentage of phagocytosing cells, top; oxidizing cells, bottom) assessed by flow cytometry. Note that neutrophil phagocytosis is enhanced when cells are stimulated with anti-CD3 $\epsilon$ /anti-CD28 antibodies whereas the number of oxidizing cells is not affected. Mean number of phagocytosing/oxidizing cells from five (top) and three (bottom) independent healthy donors are shown, respectively.
